# Supplementary material for: Immunopathogenesis and proposed clinical score for identifying Kelch-like protein-11 encephalitis
Source: PubMed Central journal article supplement — Brain Commun. 2021 Aug 26;3(3):fcab185. doi: 10.1093/braincomms/fcab185 (PMC8453430; doi:10.1093/braincomms/fcab185), 2021-08-26
Supplement: fcab185_Supplementary_Data.pdf [file fcab185_Supplementary_Data.pdf]

## Supplementary data

Supplement to: Vogrig A, Péricart S, Pinto AL et al. Immunopathogenesis and proposed clinical score for identifying Kelch-like Protein-11 encephalitis. *Brain Communications* 2021

### Table of contents

Supplementary Figure 1: Immunohistochemical studies in primary testicular tumours from control patients without KLHL11-Abs

Supplementary Figure 2: Expression of *KLHL* in the mouse brain

Supplementary Table: Neuropsychological profiles in patients with with KLHL11-Abs and complete cognitive evaluation

**Supplementary Figure 1: Immunohistochemical studies in primary testicular tumours from control patients without KLHL11-Abs**

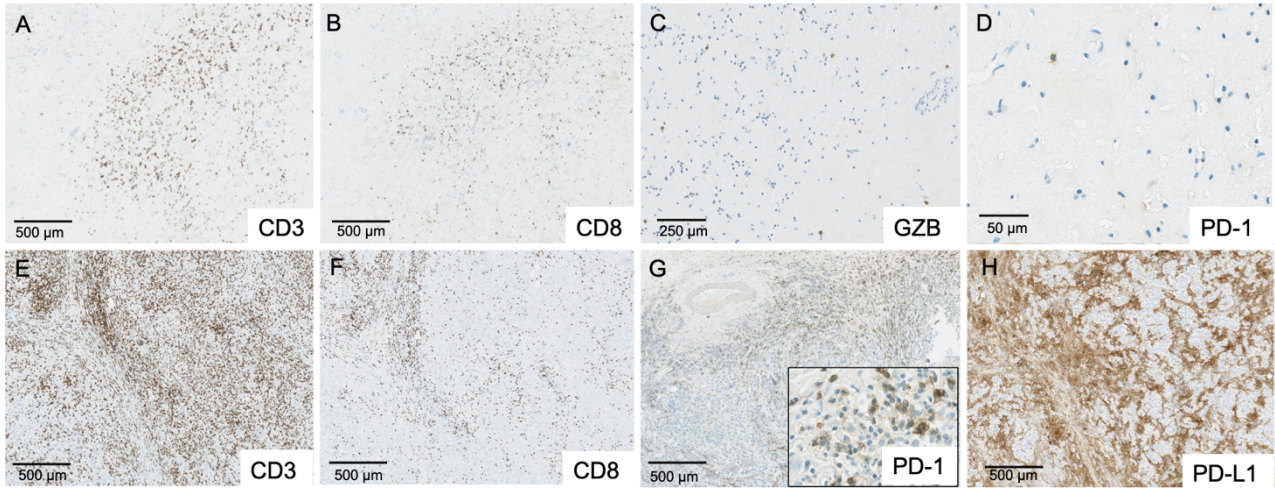

A-B: Immune profile in a «burned-out» testicular tumour (A: IHC anti-CD3 ( $\times 100$ ), B: IHC anti-CD8 ( $\times 100$ ), C: IHC anti-Granzyme B ( $\times 150$ ), D: IHC anti-PD-1 ( $\times 300$ ). E-H: Immune profile in a classical form of seminoma (E: IHC anti-CD3( $\times 100$ ), F: IHC anti-CD8( $\times 100$ ), G: IHC anti-PD-1( $\times 100$ , insert:  $\times 300$ ), H: IHC anti-PD-L1 ( $\times 100$ ).

## Supplementary Figure 2: Expression of *KLHL* in the mouse brain

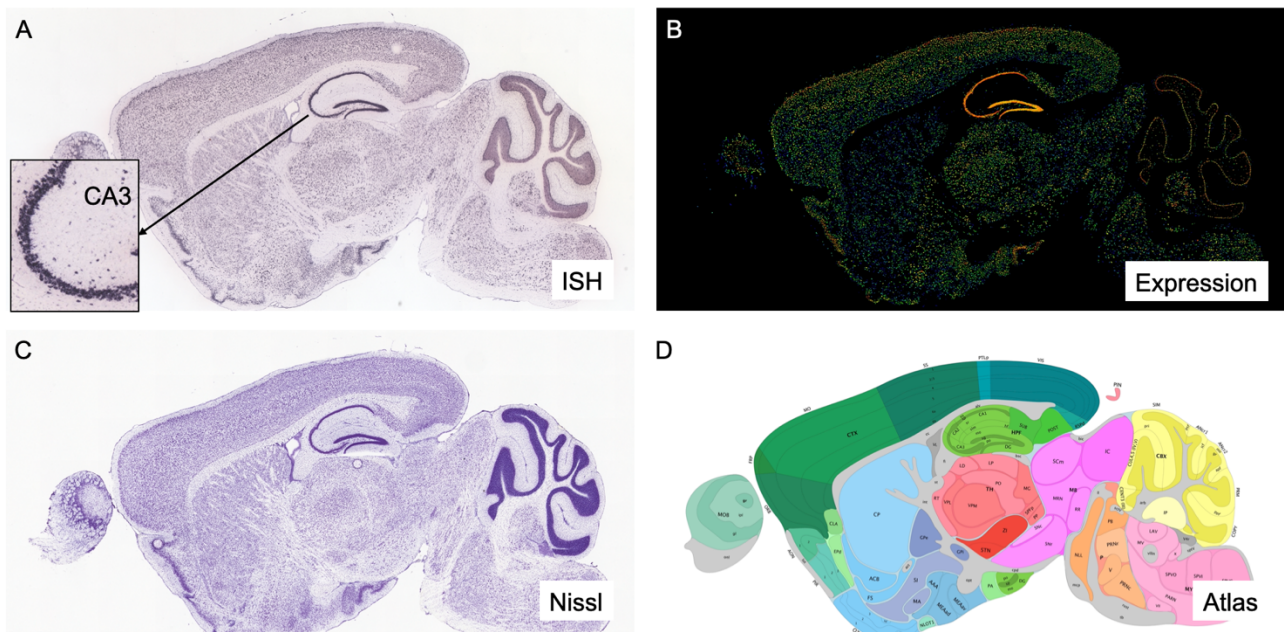

In situ hybridization (ISH) to localize the specific sequence of the *KLHL* gene using an RNA probe (A) and *KLHL* gene expression (B), as compared to Nissl staining (C), a classic nucleic staining method used on nervous tissue sections, and (D) a mouse brain atlas, shown to highlight the regions involved (hippocampus, including the CA3 region, as detailed in A, as well as the cerebellum).

© 2004 Allen Institute for Brain Science. Allen Mouse Brain Atlas. Available from: [mouse.brain-map.org](http://mouse.brain-map.org)

**Supplementary Table: Neuropsychological profiles in patients with with KLHL11-Abs and complete cognitive evaluation**

| Patient N° | Cerebellar cognitive affective syndrome (CCAS) |                                |                            |                      | Extra-CCAS cognitive impairment | Neuropsychological report (n°) and conclusions                                                                                                                                                                                                                                                                                                                                                                                                                                                  |
|------------|------------------------------------------------|--------------------------------|----------------------------|----------------------|---------------------------------|-------------------------------------------------------------------------------------------------------------------------------------------------------------------------------------------------------------------------------------------------------------------------------------------------------------------------------------------------------------------------------------------------------------------------------------------------------------------------------------------------|
|            | Executive dysfunction                          | Linguistic Processing deficits | Spatial cognition deficits | Affect dysregulation |                                 |                                                                                                                                                                                                                                                                                                                                                                                                                                                                                                 |
| 1          | X                                              |                                |                            | X                    |                                 | (1) Dysexecutive syndrome, behavioural alterations, attention deficits. Anterograde memory not affected<br><br>(2) Cognitive profile stable 10 months later<br><br>(3) Similar cognitive profile 9 months later. Marked verbal and motor perseverations. Less behavioural alterations but persistence of hyper-emotivity and low-frustration tolerance<br>MMSE: 23/30, FAB: 7/18                                                                                                                |
| 4          | X                                              | X                              |                            | X                    |                                 | (1) Dysexecutive syndrome with prominent deficits in planning, mental flexibility, and attention. Language production deficit. Difficulties in drawing and writing. Cognitive fatigability. Relatively preserved domains: working memory, episodic memory, visuo-spatial functions<br><br>(2) Cognitive profile stable 5 months later                                                                                                                                                           |
| 5          | X                                              | X                              | X                          | X                    | Hippocampal                     | (1) Massive deficit in verbal episodic memory, visuospatial exploration deficits, impaired attention. Anxiety-depressive disorder (MADR 20/60; Goldberg 8/9). MMSE 26/30<br><br>(2) Deficit in verbal episodic memory and global alteration of cognitive functions 34 months later. MMSE 25/30                                                                                                                                                                                                  |
| 6          | X                                              | X                              | X                          | X                    | Hippocampal                     | (1) Dysexecutive syndrome with deficits in mental flexibility and impaired inhibition. Working memory deficits. Impaired verbal and visual episodic memory. Anxiety                                                                                                                                                                                                                                                                                                                             |
| 8          |                                                | X                              | X                          | X                    | Hippocampal                     | (1) Deficits in episodic verbal memory (Grober & Buschke). Normal encoding (Rim), storage (RT1), and consolidation (RD). Deficits in nonverbal episodic memory. Normal flexibility (TMT-B), ability to inhibit cognitive interference (Stroop), and cognitive processing speed (TMT-A, Stroop). Deficits in visuospatial attention (Mesulam & Weintraub). Decreased verbal production and fluency, deficits in oral denomination (DO80), anxiety. Normal praxis abilities (Mahieux). MOCA 28/30 |
| 9          | X                                              | X                              |                            | X                    | Hippocampal                     | (1) Dysexecutive syndrome with alteration in planning, mental flexibility. Agrammatism. Deficit of episodic memory (verbal and visual) and working memory. Apathy, abulia, anhedonia. MMSE: 18/30, BEC 96: 55/96, Clock drawing test: 5/7, FAB: 7/18, Praxis: symbolic gestures 3/5, action mimicking 10/10, abstract gestures 5/8                                                                                                                                                              |

Abbreviations: BEC, Batterie d'évaluation cognitive (cognitive evaluation battery); CCAS, Cerebellar cognitive affective syndrome; FAB, frontal assessment battery; MADR, Montgomery-Åsberg Depression Rating Scale; MMSE, Mini Mental State Examination; RT1, Reaction Time test 1; TMT, Trail Making Test
